# Supplementary material for: Impact of Percutaneous Mitral Valve Repair Using the MitraClipTM System on Ventricular Arrhythmias and ICD Therapies
Source: MDPI journal article supplement (doi:10.3390/life12030344), 2022-02-25
Supplement: s1 [file s1]

Supplementary Materials

# Impact of Percutaneous Mitral Valve Repair Using the MitraClip™ System on Ventricular Arrhythmias and ICD Therapies

Nicolas A. Geis \*, Anna Göbbel, Michael M. Kreusser, Tobias Täger, Hugo A. Katus, Norbert Frey, Philipp Schlegel † and Philip W. Raake †

Department of Internal Medicine III, University of Heidelberg, Im Neuenheimer Feld 410, 69120 Heidelberg, Germany; anna-goebbel@web.de (A.G.); michael.kreusser@med.uni-heidelberg.de (M.M.K.); tobias.taeger@med.uni-heidelberg.de (T.T.); hugo.katus@med.uni-heidelberg.de (H.A.K.); norbert.frey@med.uni-heidelberg.de (N.F.); philipp.schlegel@med.uni-heidelberg.de (P.S.); philip.raake@med.uni-heidelberg.de (P.W.R.)

\* Correspondence: nicolas.geis@med.uni-heidelberg.de; Tel.: +49-6221-56-8676; Fax: +49-6221-56-5515

† These authors contributed equally to this manuscript.

**Table S1.** Baseline and procedural characteristics

| Baseline characteristics                            | Patients included in the study (n=86) | Patients excluded due to missing cardiac device holter information (n=167) | p-value      |
|-----------------------------------------------------|---------------------------------------|----------------------------------------------------------------------------|--------------|
| Sex (male)                                          | 69/86 (80.2%)                         | 127/167 (76.0%)                                                            | 0.450        |
| Age (years; median)                                 | 66.5 [58;76]                          | 72.0 [61;82]                                                               | <0.001       |
| mitral regurgitation etiology                       | degenerative                          | 24/162 (14.8%)                                                             | 0.066        |
|                                                     | functional                            | 110/162 (67.9%)                                                            |              |
|                                                     | mixed                                 | 28/162 (17.3%)                                                             |              |
| Left ventricular ejection fraction (%)              | 22.1 (±10.3)                          | 27.7 (±13.7)                                                               | 0.008        |
| Left ventricular ejection fraction ≤35%             | 78/86 (90.7%)                         | 123/167 (73.7%)                                                            | 0.003        |
| LA Diameter (mm)                                    | 54.6 (±9.7)                           | 51.6 (±6.6)                                                                | 0.006        |
| LVEDD (mm)                                          | 59.0 (±12.3)                          | 52.0 (±13.5)                                                               | <0.001       |
| LVEDD (mm)                                          | 68.2 (±11.0)                          | 63.3 (±10.8)                                                               | <0.001       |
| Systolic PA pressure (TTE; mmHg)                    | 51 (±13)                              | 50 (±13)                                                                   | 0.686        |
| hsTNT (pg/ml)                                       | 45.0 (±39.2)                          | 45.1 (±34.2)                                                               | 0.282        |
| NT-proBNP (ng/l)                                    | 9392 (±12465)                         | 8274 (±10767)                                                              | 0.232        |
| 6 minute walk test distance (m)                     | 335 (±126)                            | 305 (±151)                                                                 | 0.206        |
| NYHA stage (mean)                                   | 3.1 (±0.5)                            | 3.2 (±0.5)                                                                 | <b>0.017</b> |
| Stage 1                                             | 0/86 (0%)                             | 0/167 (0%)                                                                 | 0.089        |
| Stage 2                                             | 10/86 (11.6%)                         | 9/167 (5.4%)                                                               |              |
| Stage 3                                             | 61/86 (70.9%)                         | 110/167 (65.9%)                                                            |              |
| Stage 4                                             | 15/86 (17.4%)                         | 48/167 (28.7%)                                                             |              |
| EuroScore II (%)                                    | 12.5 (±12.0)                          | 9.8 (±8.5)                                                                 | 0.089        |
| Significant CAD                                     | 63/86 (73.3%)                         | 84/167 (50.3%)                                                             | <b>0.020</b> |
| Prior cardiothoracic surgery                        | 33/86 (38.4%)                         | 45/167 (26.6%)                                                             | 0.062        |
| Atrial fibrillation                                 | 56/86 (65.1%)                         | 107/167 (64.1%)                                                            | 0.869        |
| Prior stroke                                        | 7/86 (8.1%)                           | 24/167 (14.4%)                                                             | 0.152        |
| Increased retention values (Creatinine ≥ 1.3 mg/dL) | 45/86 (52.3%)                         | 95/167 (56.9%)                                                             | 0.489        |

|                                                           |               |                |              |
|-----------------------------------------------------------|---------------|----------------|--------------|
| Sleep apnoea syndrome                                     | 6/86 (7.0%)   | 9/167 (5.4%)   | 0.613        |
| Pulmonary disease                                         | 16/86 (18.6%) | 32/167 (19.2%) | 0.915        |
| Diabetes mellitus                                         | 23/86 (26.7%) | 63/167 (37.7%) | 0.081        |
| Cancer                                                    | 6/86 (7.0%)   | 6/167 (3.6%)   | 0.471        |
| active                                                    | 3/86 (3.5%)   | 5/167 (3.0%)   |              |
| state after                                               | 42/86 (48.8%) | 84/167 (50.3%) | 0.826        |
| Implantable cardioverter defibrillator (ICD)              | 1/86 (1.2%)   | 3/167 (1.8%)   | 1.000        |
| Cardiac resynchronization therapy - pacemaker (CRT-P)     | 39/86 (45.3%) | 37/167 (22.2%) | <b>0.001</b> |
| Cardiac resynchronization therapy - defibrillator (CRT-D) | 4/86 (4.7%)   | 41/167 (24.6%) | <b>0.001</b> |
| Pacemaker                                                 | 9/86 (11.6%)  | 10/167 (6.0%)  | 0.201        |
| Prior Cardiopulmonary Resuscitation                       |               |                |              |

### Procedural characteristics

|                                               |               |                 |       |
|-----------------------------------------------|---------------|-----------------|-------|
| Number of implanted MitraClip™ devices (mean) | 1.37 (±0.51)  | 1.41 (±0.56)    | 0.712 |
| MR grade preprocedural (mean)                 | 3.0 (±0.05)   | 3.0 (±0.00)     | 0.340 |
| MR grade postprocedural (mean)                | 1.15 (±0.47)  | 1.20 (±0.54)    | 0.643 |
| Technical success                             | 86/86 (100%)  | 167/167 (100%)  | 1.000 |
| Device success                                | 84/86 (97.7%) | 162/167 (97.0%) | 1.000 |

LA, left atrium; LVESD, left ventricular end-systolic diameter; LVEDD, left ventricular end-diastolic diameter; PA, pulmonary artery; TTE, transthoracic echocardiography; hsTNT, high-sensitive Troponin T; MR, mitral regurgitation; NT-proBNP, N-terminal prohormone Brain Natriuretic Peptide; NYHA, New York Heart Association; STS, Society of Thoracic Surgeons; CAD, coronary artery disease; nsVT, non-sustained ventricular tachycardia; VT, ventricular tachycardia; VF, ventricular fibrillation; VA, ventricular arrhythmia.

**Table S2.** Mortality reasons

|   | 2-year Mortality   | Value         |
|---|--------------------|---------------|
|   | All-cause          | 32/83 (38.6%) |
| - | Cardiovascular     | 6/32 (18.8%)  |
| - | Non-cardiovascular | 9/32 (28.1%)  |
| - | Unknown reason     | 17/32 (53.1%) |

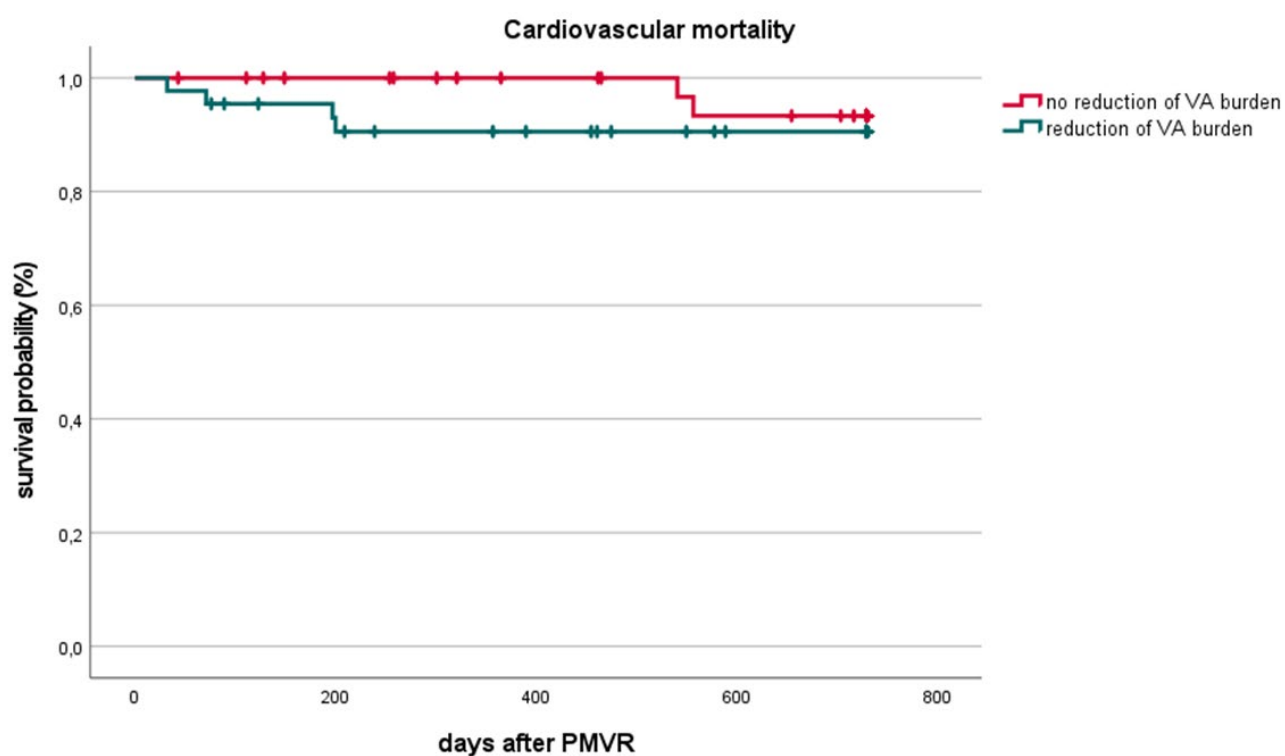

**Figure S1.** Kaplan-Meier curve for cardiovascular mortality according to VA burden reduction. VA, ventricular arrhythmia; PMVR, percutaneous mitral valve repair; Log-Rank-Test:  $p=0.441$ .
